# Supplementary material
Source: MDPI journal article supplement (https://www.mdpi.com/2071-1050/13/20/11442)
Supplement: s1 [file s1 › Supplementary materials.pdf]

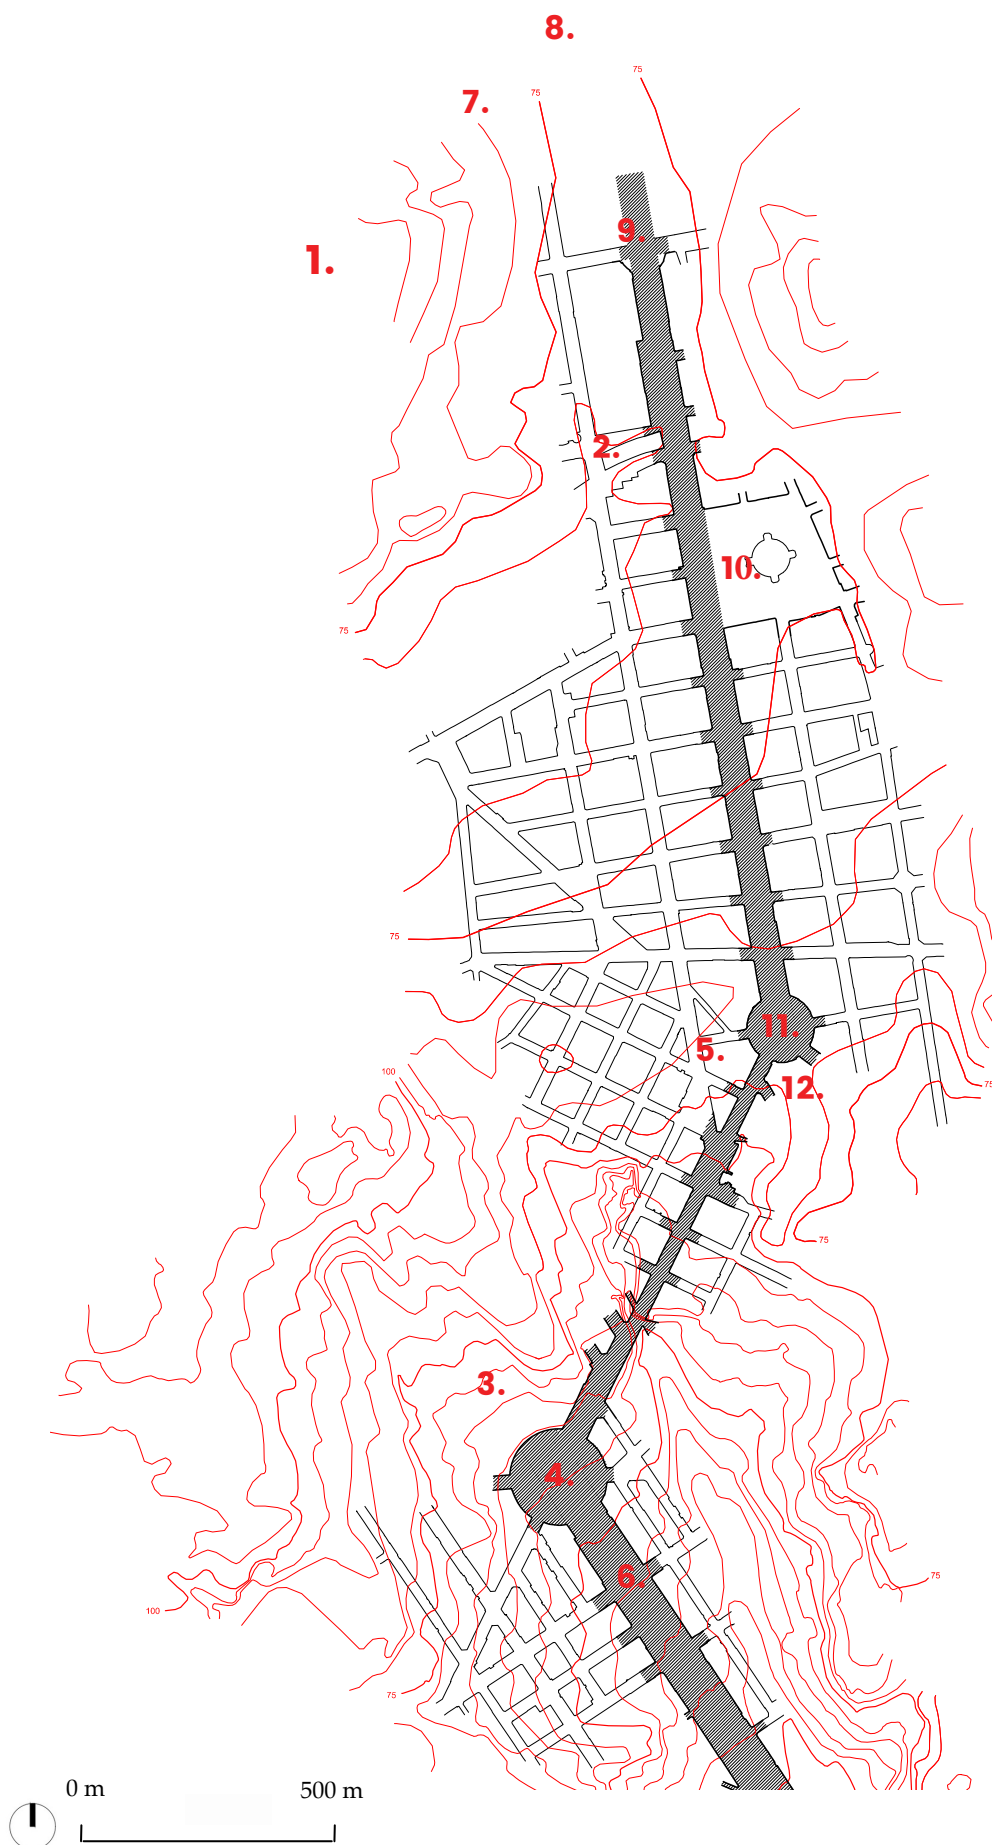

**Figure S1.** The central axis of Lisbon and the surrounding landmarks.

1.

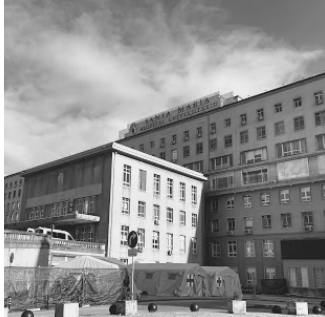

2.

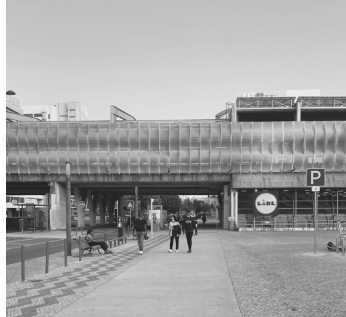

3.

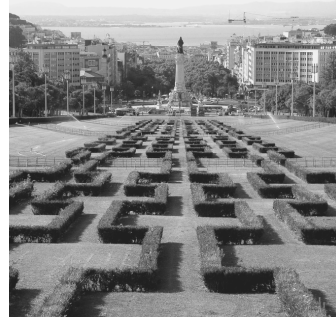

4.

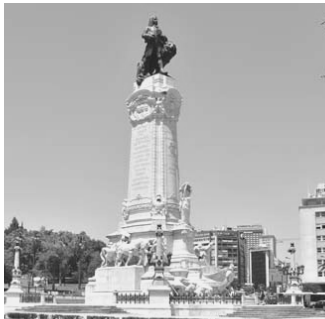

5.

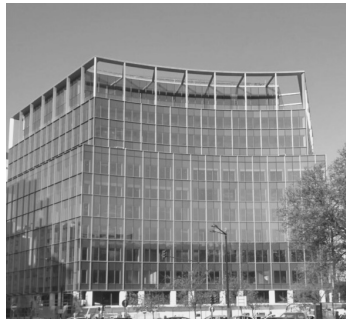

6.

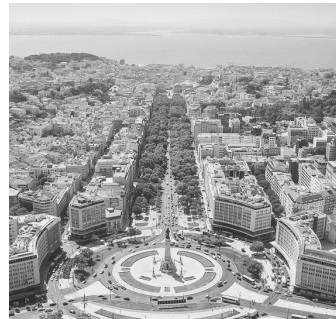

7.

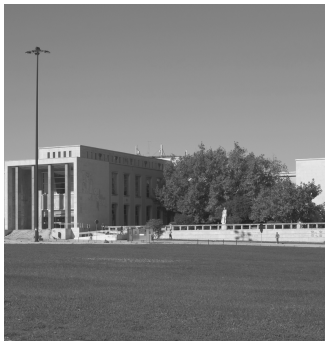

8.

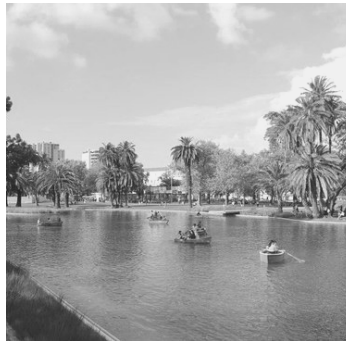

9.

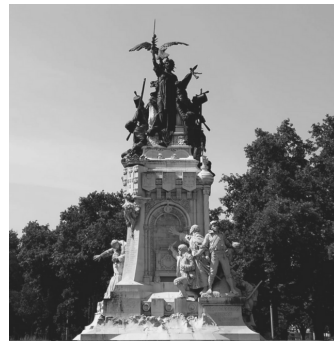

10.

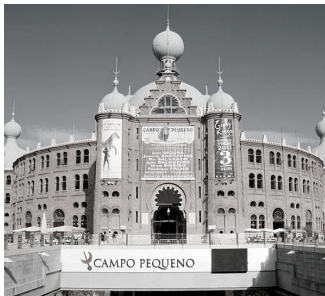

11.

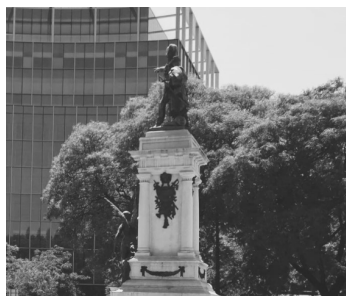

12.

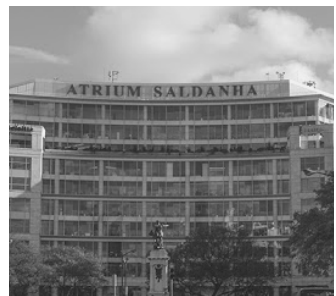

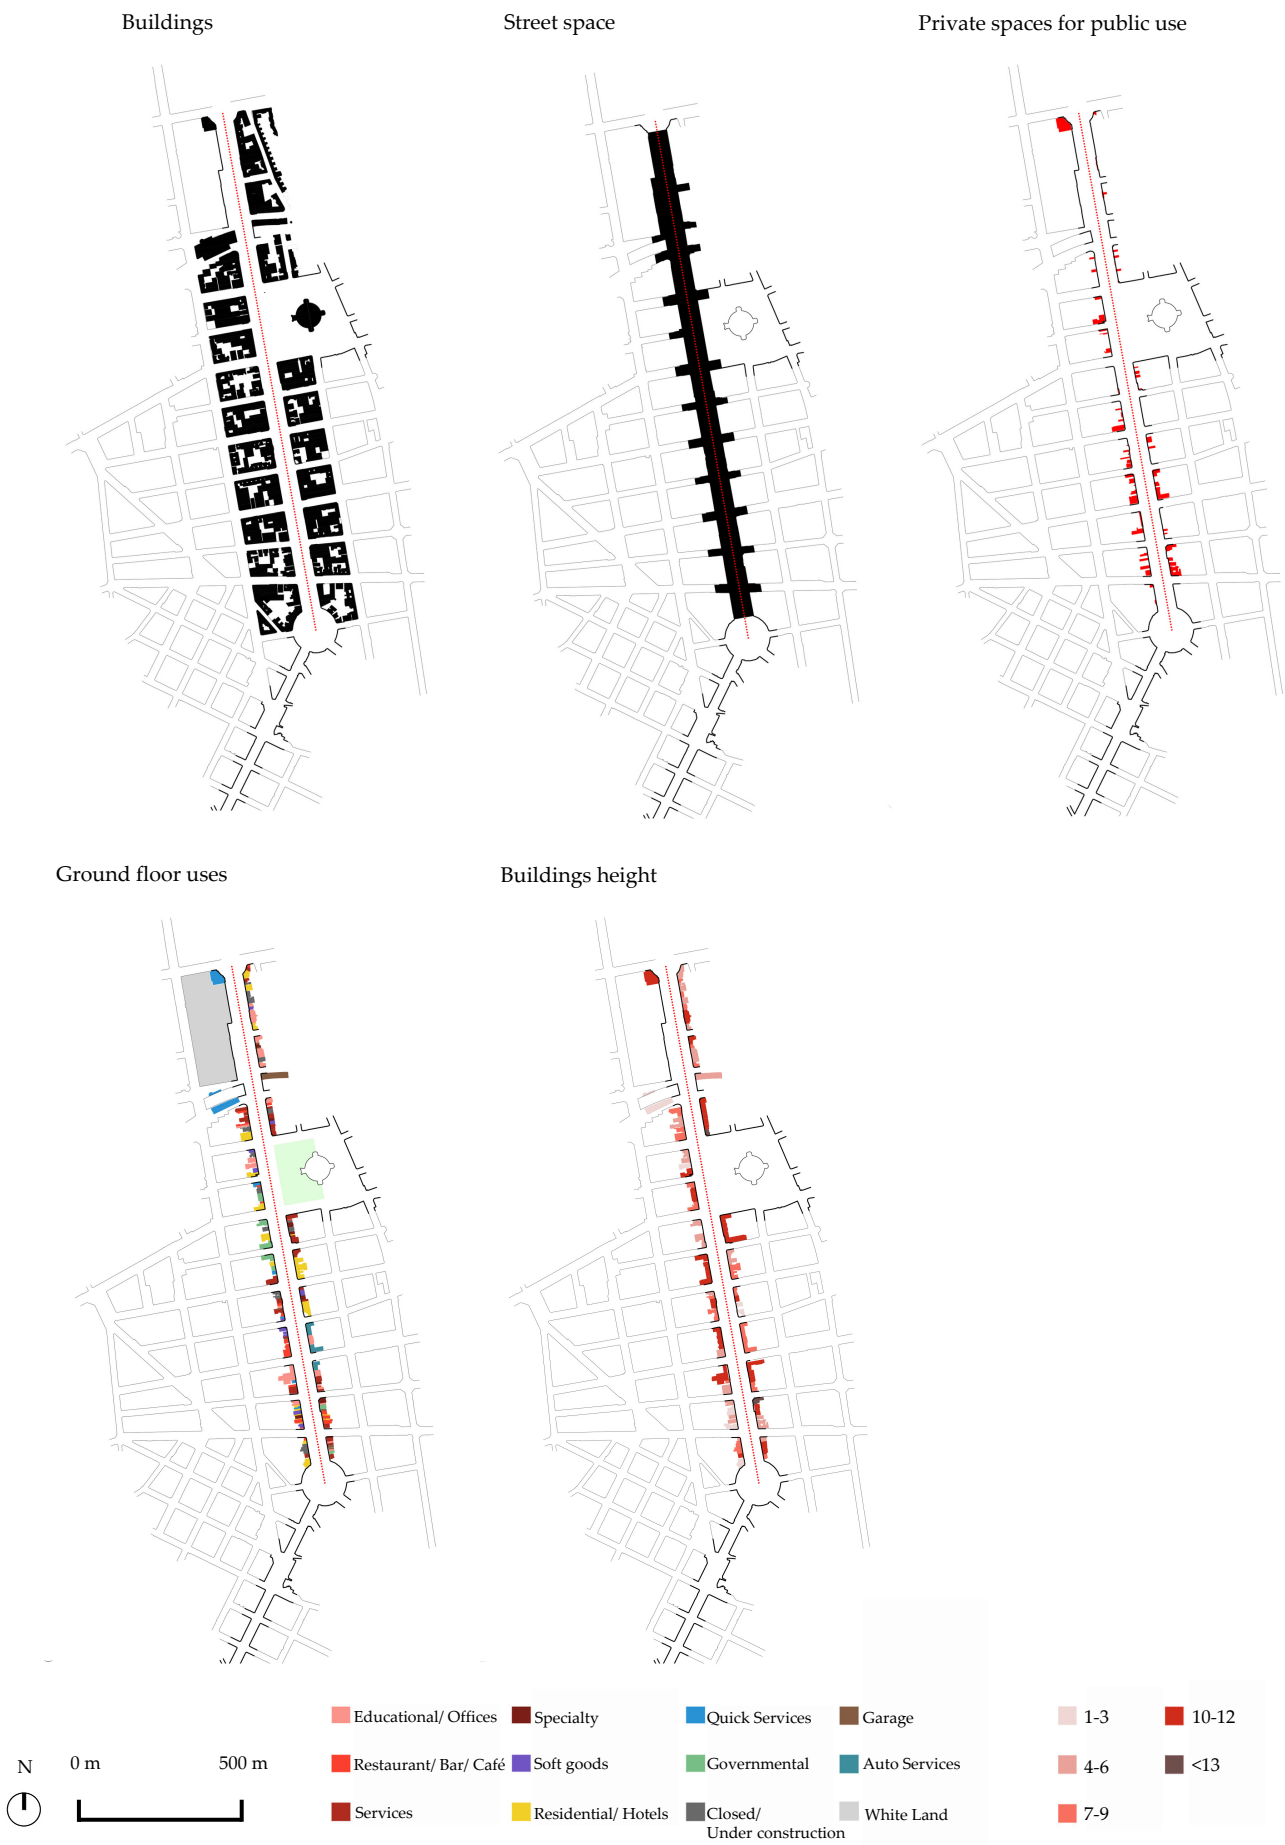

**Figure S2.** Atlas for decoding the urban form of Avenida da República, Lisbon.

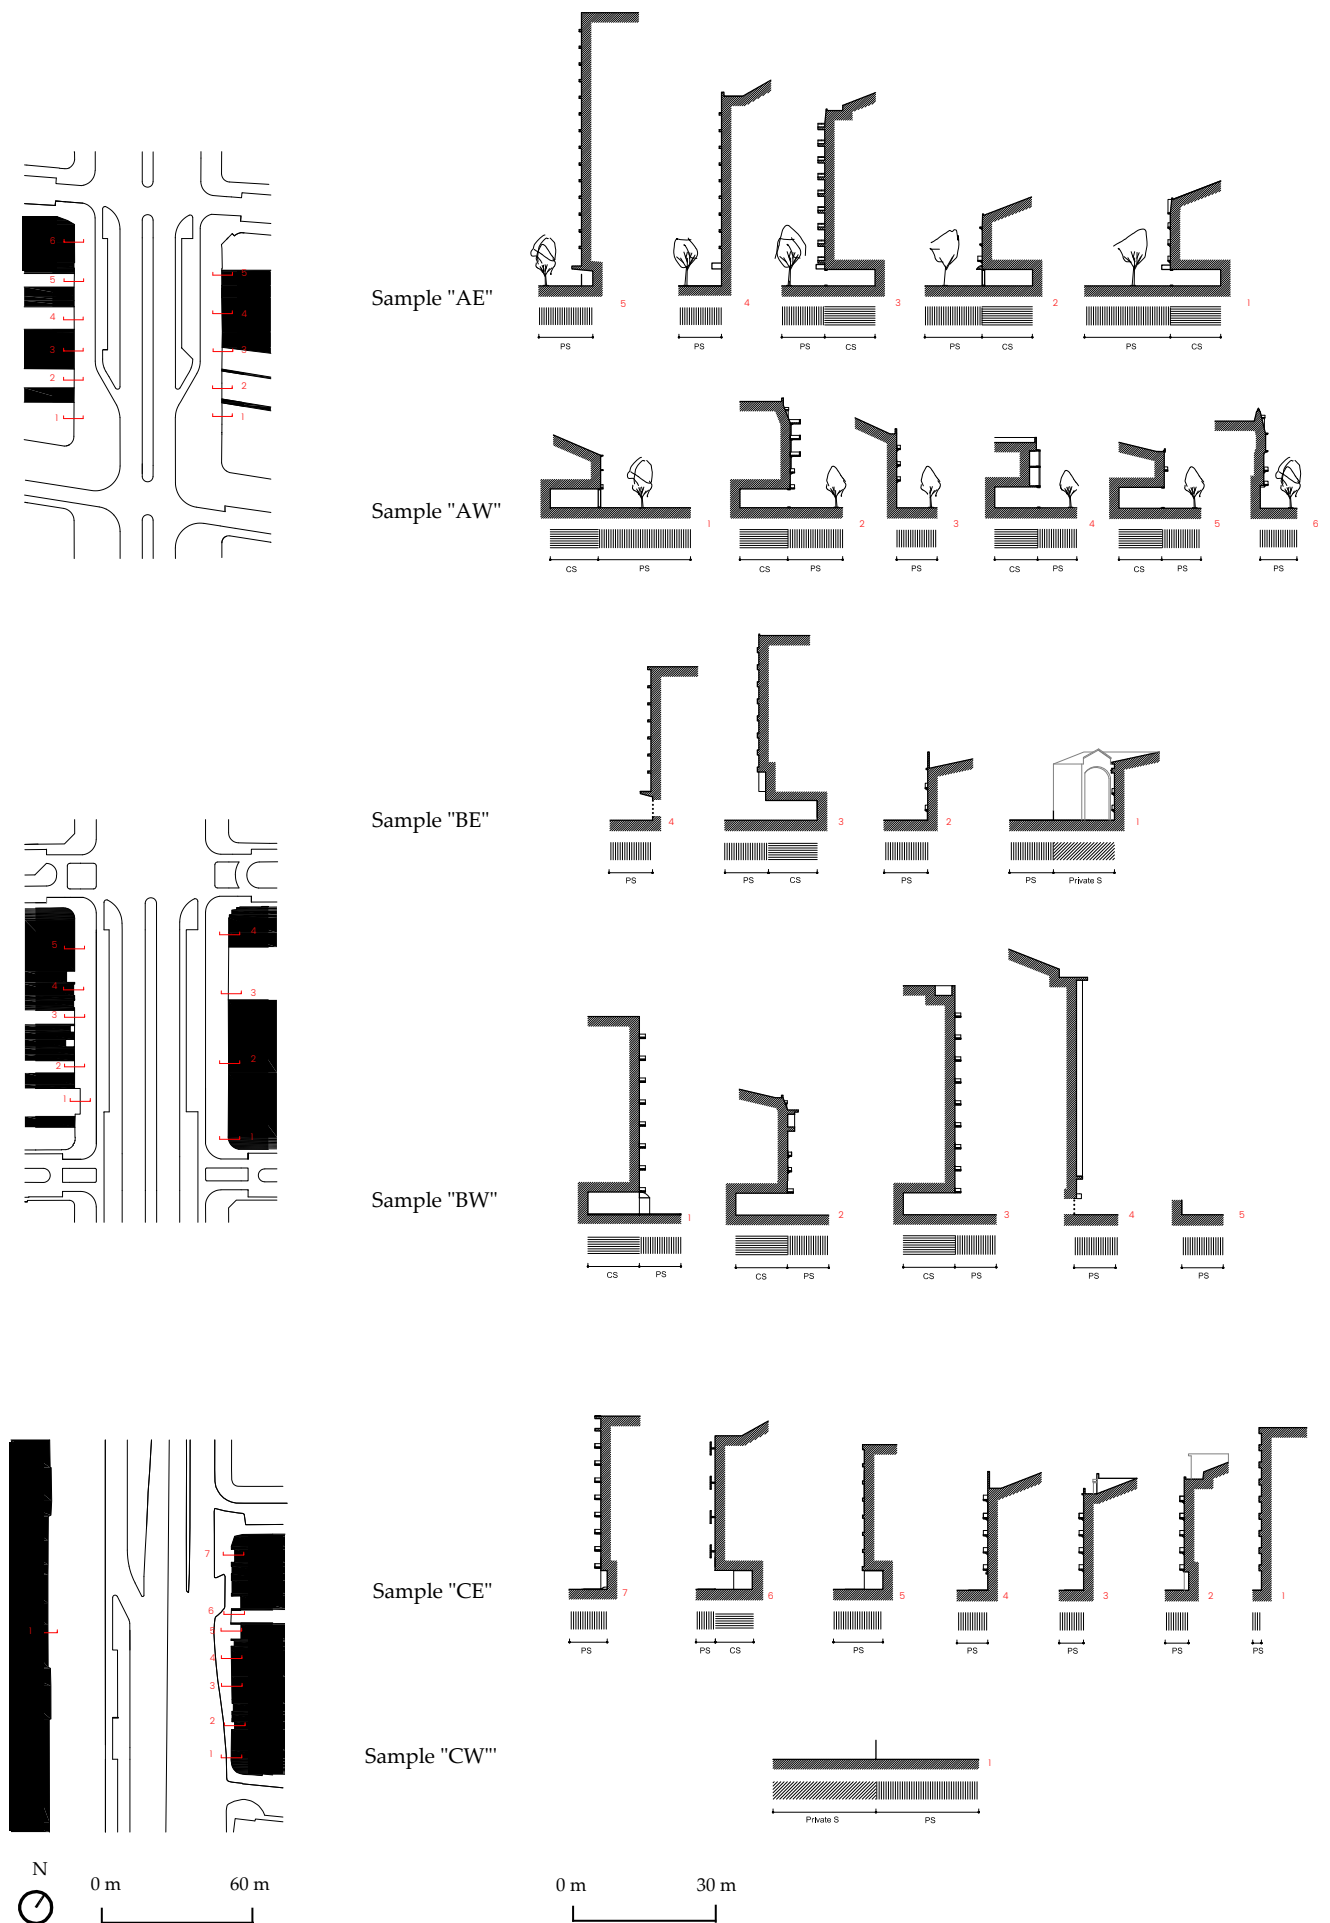

**Figure S3.** Plans and cross-sections of the three selected samples "A", "B" and "C", showing the visual and physical permeability of the street interfaces.

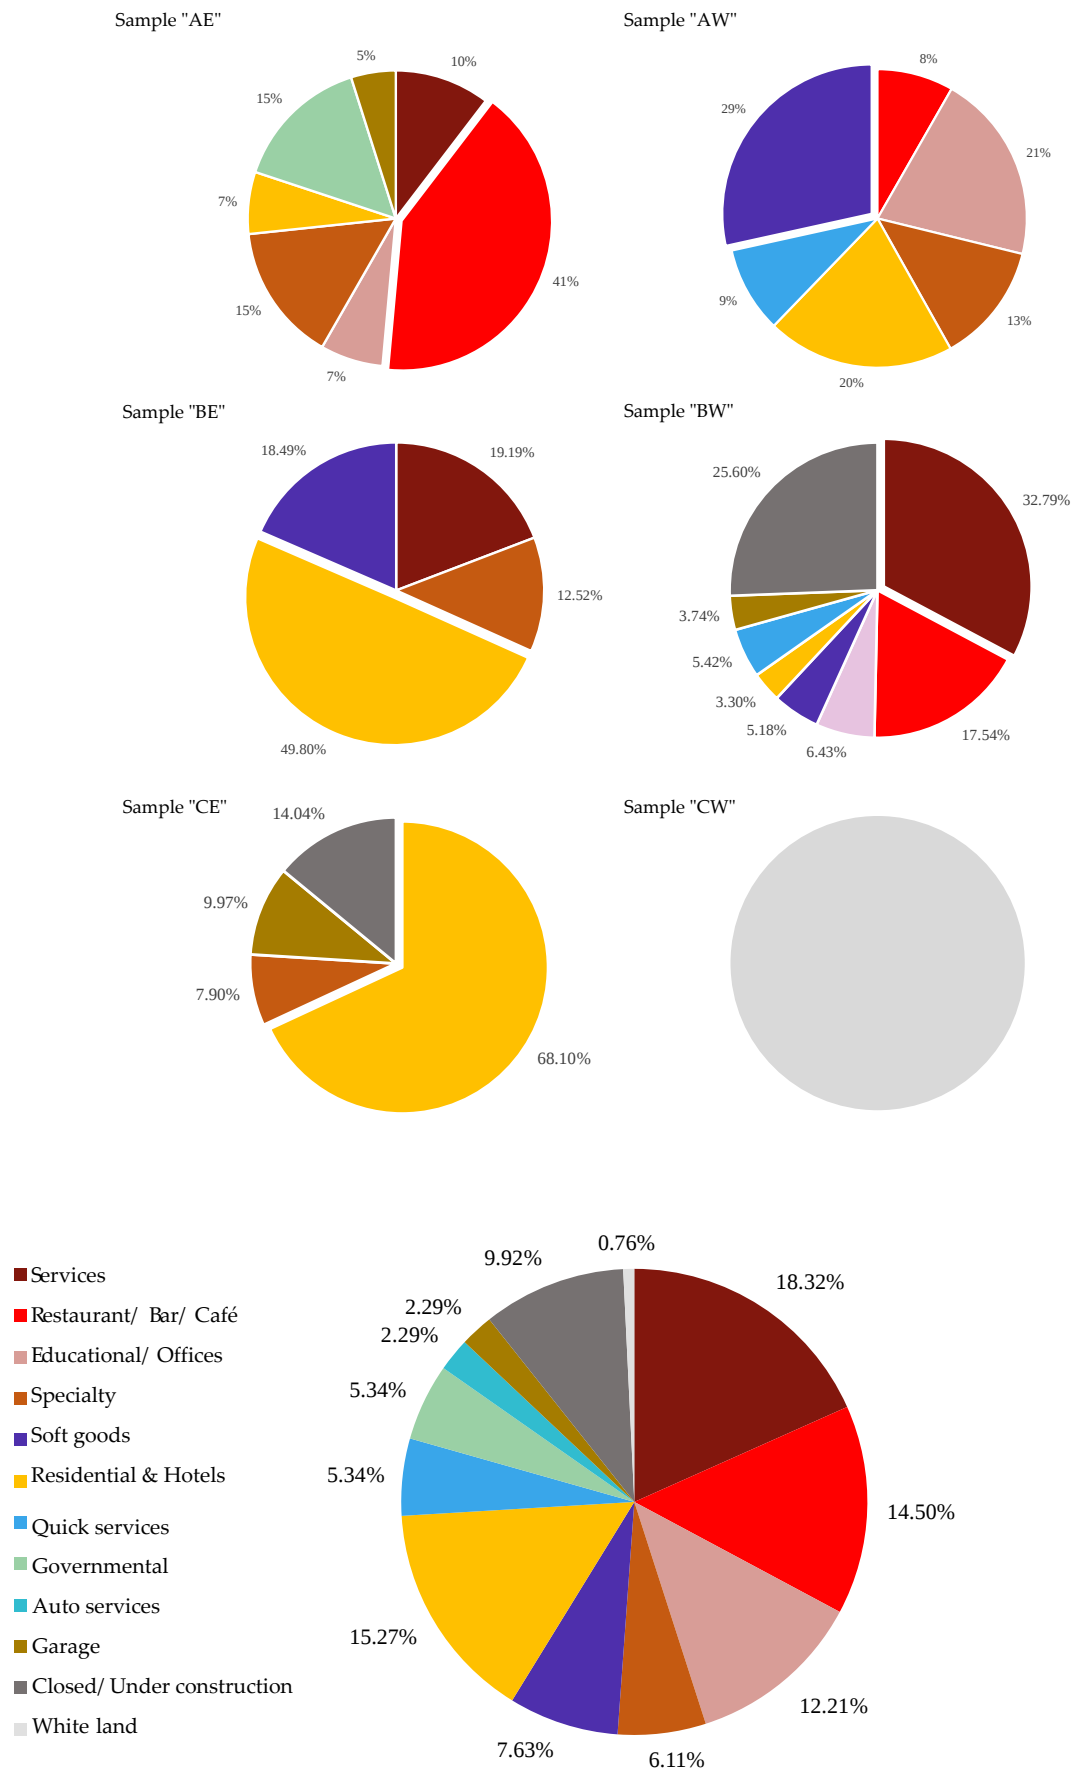

**Figure S4.** The percentages of the ground-floor uses in Avenida da República and in the three samples "A", "B", and "C".

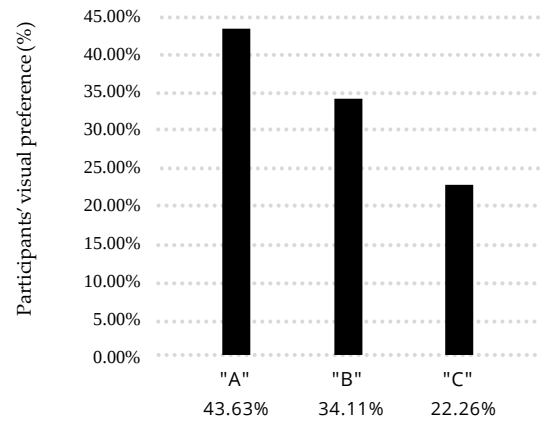

**Figure S5.** The percentage of participants' visual preference of the three samples "A", "B", and "C".

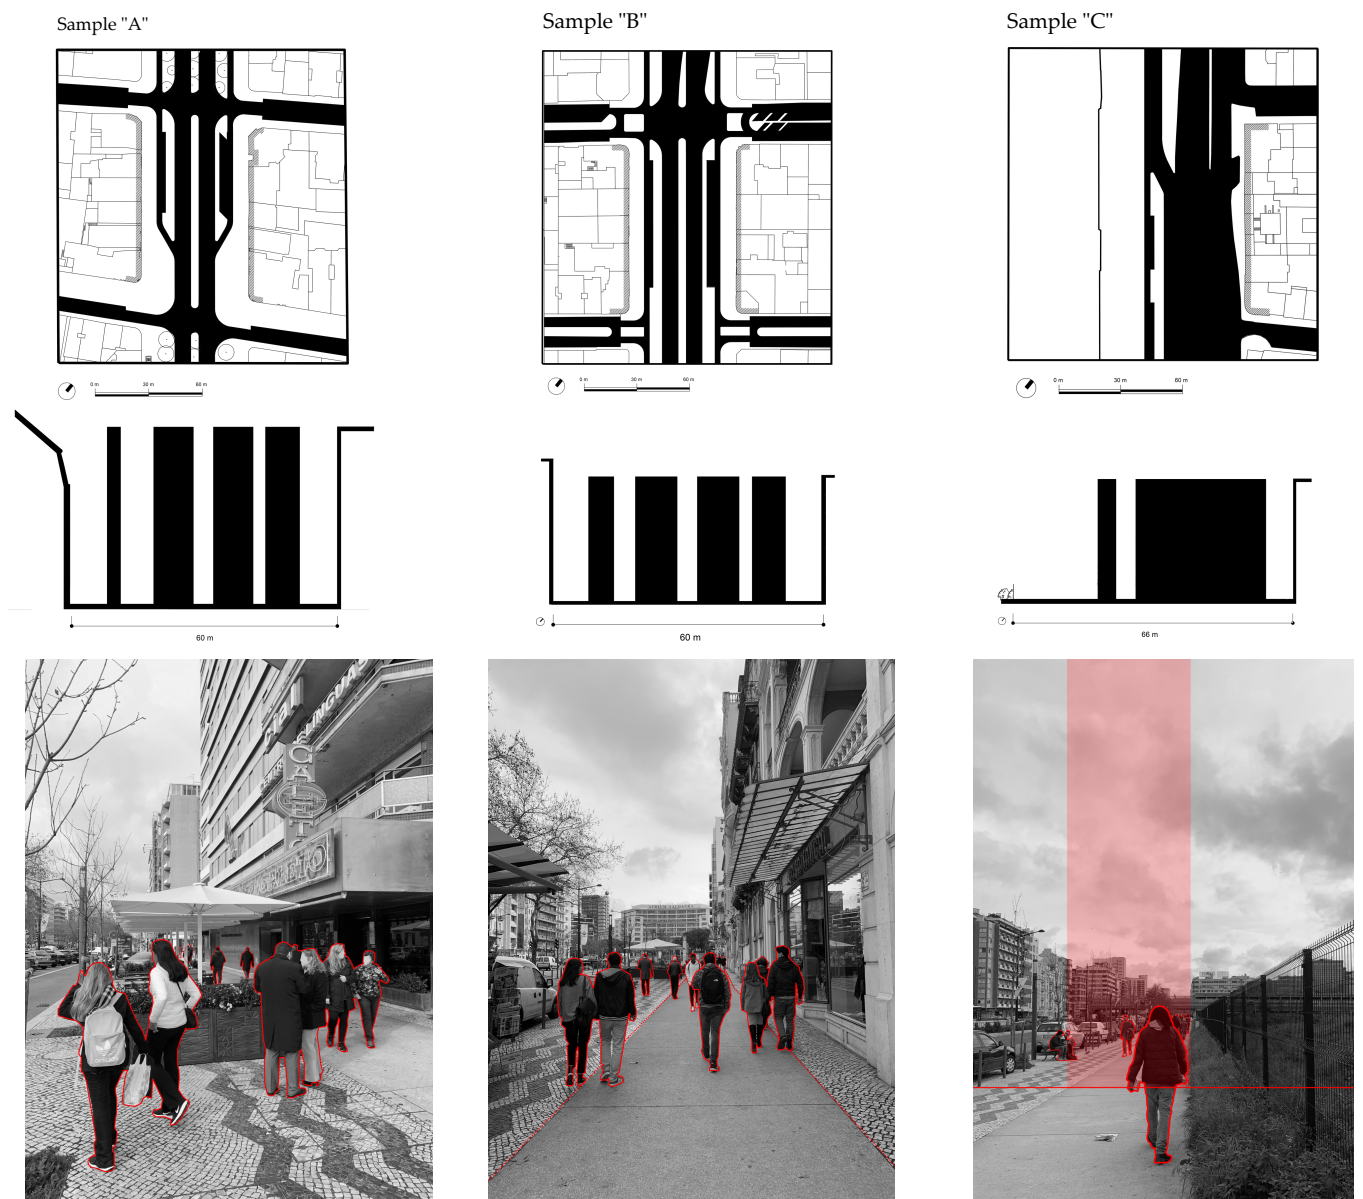

**Figure S6.** The sidewalk width and partitions of samples "A", "B", and "C".
